# Supplementary material for: Spontaneous growth of silver nanotrees dominated with (111) crystalline faces on monolithic activated carbon
Source: Royal Society of Chemistry journal article supplement (doi:10.1039/c6ra19399d), 2016-01-01
Supplement: c6ra19399d1.pdf [file c6ra19399d1.pdf]

**S1 Table 1.** Structural Parameters of monolithic activated carbon (MAC) used in this work ( $\text{PO}_4^{3-}$ -MAC).

| monolithic activated carbon | BET Surface Area ( $\text{m}^2/\text{g}$ ) | Pore Volume (single point) ( $\text{cm}^3/\text{g}$ ) | Pore Size (4V/A by BET) (nm) | Apparent Density ( $\text{g}/\text{cm}^3$ ) |
|-----------------------------|--------------------------------------------|-------------------------------------------------------|------------------------------|---------------------------------------------|
| MAC                         | 380                                        | 0.226                                                 | 2.38                         | 0.740                                       |

**S2 Table 2.** Major elemental composition in atomic percent (%) of monolithic activated carbon (MAC) as determined by X-ray photoelectron Spectroscopy (XPS).

| monolithic activated carbon | C     | O     | P    |
|-----------------------------|-------|-------|------|
| MAC                         | 59.29 | 36.85 | 3.87 |

**S3 Table 3.** Elemental analysis with the energy-dispersive x-ray spectrum of  $\text{PO}_4^{3-}$ -MAC being treated by HCl ( $\text{Cl}^-$ -MAC) and NaOH ( $\text{OH}^-$ -MAC).

| Element | Atom% ( $\text{PO}_4^{3-}$ -MAC) | Atom% ( $\text{Cl}^-$ -MAC) | Atom% ( $\text{OH}^-$ -MAC) |
|---------|----------------------------------|-----------------------------|-----------------------------|
| C       | 75.57                            | 82.76                       | 74.69                       |
| O       | 18.25                            | 6.45                        | 21.37                       |
| Si      | 0.84                             | 3.54                        | 0.87                        |
| Na      | /                                | /                           | 1.56                        |
| P       | 3.82                             | 0.27                        | 0.57                        |
| Cl      | /                                | 1.54                        | /                           |
| K       | 0.8                              | 0.75                        | 0.53                        |
| Zn      | 0.72                             | 4.7                         | 0.4                         |
| Total   | 100                              | 100                         | 100                         |

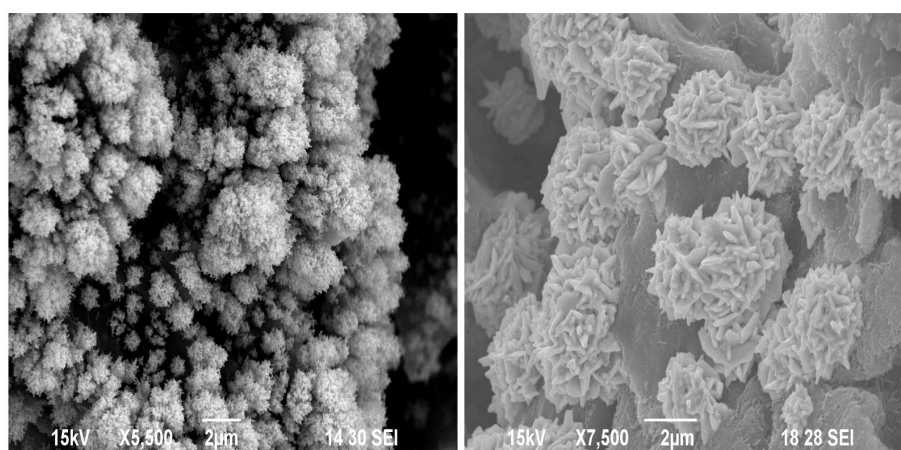

**S4 Fig.1.** SEM images of (a) Pd fractal and (b) Au fractal samples obtained on monolithic activated carbon (MAC).
